# Supplementary material for: White Matter Changes Associated with Resting Sympathetic Tone in Frontotemporal Dementia vs. Alzheimer’s Disease
Source: PLoS One. 2015 Nov 25;10(11):e0142445. doi: 10.1371/journal.pone.0142445 (PMC4659677; doi:10.1371/journal.pone.0142445)
Supplement: S1 File — (DAT) [file pone.0142445.s001.dat]

     6.00000065-01-06                       1.00000 40372.00000    62.00000    58.00000     4.00000     1.00000     1.00000     1.00000      .00000    14.00000     1.00000    50.00000     9.00000     2.00000     1.00000      .00000    14.00000     1.00000     1.00000    23.00000   888.000002        5        7         14    12.00000     3.00000      .50000     6.00000      .00000      .00000      .00000      .00000      .00000      .00000     3.00000     3.00000      .00000     4.00000      .00000     3.00000    13.00000    10.00000     3.00000     5.00000     1.00000     8.00000     1.00000    28.00000         6.0      .12101     6.00000       179.0       166.0        90.0        94.0        47.0        89.0       149.0       157.0       229.0       253.0       349.0       312.0       393.0       499.0       628.0       585.0       998.0       862.0      1078.0      1042.0       303.0       223.0       617.0       600.0       175.0       143.0       186.0       177.0       560.0       525.0        45.0        42.0       179.0       213.0       390.0       360.0       480.0       459.0        27.0        27.0       109.0       140.0       611.0       692.0        20.0        62.0       445.0       504.0       463.0       648.0       446.0       542.0       236.0       241.0        67.0        42.0       891.0       761.0       378.0       312.0      2065.0      2272.0      1510.0      1273.0     6.00000065-01-06                    1176.00000   874.00000  1514.00000  1421.00000  1027.00000   897.00000   651.00000   611.00000   256.00000   273.00000   177.00000   174.00000   248.00000   257.00000   300.00000   231.00000   237.00000   323.00000   191.00000   223.00000   854.00000   751.00000   882.00000   834.00000   471.00000   439.00000  1056.00000   978.00000   173.00000   156.00000    83.00000    75.00000   547.00000   512.00000   102.00000   201.00000   709.00000   753.00000      .40506      .32149      .35370      .25183      .43505      .41096      .50461      .47830      .33912      .35512      .18612      .51396      .40317      .47505      .28592      .28344      .14987      .24708      .34627      .35662      .32872      .31184      .22885      .21568      .14133      .16343      .20455      .18933      .30990      .32060      .11202      .43135      .22825      .27681      .26329      .27363      .32990      .21158      .20229      .30482      .37885      .38485      .35766      .26331      .36430      .14646      .16115      .22525      .28325      .28263      .36678      .28972      .37743      .43045      .28751      .31919      .27671      .27511      .16831      .20996      .16016      .18491      .18659      .17339      .17753      .17884      .24138      .22198      .21532      .18685      .18316      .17214      .16085      .19082      .19460      .19588      .12729      .13846      .10949      .11715      .32188      .23841      .09120      .11112      .16467      .17152      .18143      .19894      .18934      .18432      .21379      .19068      .07673      .08434      .14160      .11816      .15390      .18772      .09424      .14340      .26086      .26532
     7.00000065-01-07                       1.00000 40450.00000    65.00000    62.00000     3.00000     2.00000     1.00000     1.00000      .00000    13.00000     1.00000    67.00000     1.00000     1.00000     1.00000      .00000    16.00000     1.00000     1.00000               888.000003        8        7         18    26.00000     6.00000     1.00000     8.50000      .00000      .00000      .00000      .00000      .00000     8.00000     8.00000      .00000      .00000     8.00000      .00000    12.00000    36.00000     9.00000     3.00000     5.00000     2.00000     6.00000      .00000    25.00000        14.0      .18976     7.00000       184.0       182.0       116.0       120.0        87.0        90.0       175.0       154.0       226.0       271.0       272.0       288.0       354.0       312.0       804.0       821.0       835.0       897.0       990.0       969.0       310.0       295.0       630.0       619.0       189.0       188.0       168.0       167.0       633.0       618.0        32.0        32.0       278.0       269.0       341.0       436.0       464.0       476.0        44.0        48.0        96.0       125.0       926.0       893.0         4.0        38.0       342.0       379.0       432.0       527.0       546.0       792.0       222.0       276.0        74.0        57.0      1244.0      1046.0       391.0       403.0      1932.0      2731.0      1464.0      1843.0     7.00000065-01-07                    1264.00000  1031.00000  1583.00000  1735.00000  1136.00000  1058.00000   617.00000   708.00000   304.00000   337.00000   240.00000   222.00000   240.00000   225.00000   300.00000   252.00000   319.00000   319.00000   251.00000   283.00000  1041.00000  1074.00000   848.00000   975.00000   510.00000   562.00000  1078.00000  1144.00000   199.00000   165.00000   102.00000    98.00000   497.00000   587.00000   131.00000   180.00000   863.00000   982.00000      .31634      .32763      .24353      .20409      .34360      .37048      .54522      .56586      .54989      .45662      .11561      .06155      .54598      .31882      .26249      .26130      .12085      .10796      .37589      .31895      .41511      .34529      .21182      .26411      .15897      .14043      .21595      .25151      .32785      .26425      .06299      .03918      .25741      .19657      .18129      .24507      .29189      .35918      .11534      .22375      .42913      .33963      .23509      .24589      .06068      .10665      .06844      .08512      .05304      .08193      .22750      .34770      .43836      .33894      .07362      .21857      .26805      .25593      .29223      .17871      .20192      .15324      .15364      .15509      .13592      .15125      .23863      .23309      .20662      .14561      .23137      .18197      .17153      .14936      .14833      .13874      .20072      .10907      .11097      .10357      .17705      .14009      .15314      .15826      .18034      .13439      .21711      .19581      .16846      .15477      .23181      .19286      .11448      .10303      .11163      .09542      .17872      .20899      .11185      .12104      .21446      .21500
     8.00000065-01-08                       1.00000 40421.00000    76.00000    74.00000     2.00000     1.00000     1.00000     1.00000      .00000    20.00000     1.00000    73.00000     1.00000     2.00000     1.00000      .00000    18.00000     1.00000      .00000    50.00000     2.000008        12       8         28    26.00000     6.00000     1.00000     8.50000      .00000      .00000     4.00000      .00000      .00000      .00000     4.00000     4.00000      .00000     6.00000      .00000     8.00000    26.00000    10.00000     2.00000     5.00000      .00000     7.00000     1.00000    25.00000        25.0      .10509     8.00000       173.0       159.0       127.0       131.0        90.0       106.0       184.0       173.0       303.0       329.0       415.0       347.0       488.0       507.0       940.0       718.0       945.0      1040.0      1279.0      1063.0       329.0       239.0       652.0       536.0       212.0       161.0       213.0       172.0       686.0       778.0        38.0        26.0       192.0       231.0       447.0       439.0       540.0       543.0        46.0        47.0        97.0       121.0       869.0       859.0        47.0        47.0       435.0       461.0       408.0       401.0       618.0       622.0       279.0       279.0        76.0        30.0      1592.0      1332.0       473.0       433.0      2468.0      3497.0      1889.0      2377.0     8.00000065-01-08                    1453.00000  1515.00000  2092.00000  2683.00000  1428.00000  1507.00000  1045.00000   945.00000   389.00000   368.00000   279.00000   217.00000   269.00000   214.00000   405.00000   286.00000   411.00000   452.00000   303.00000   297.00000  1377.00000  1250.00000   983.00000  1088.00000   578.00000   619.00000  1252.00000  1335.00000   189.00000   185.00000    94.00000    85.00000   699.00000   699.00000   116.00000   193.00000  1143.00000  1183.00000      .34938      .41981      .30017      .34511      .39739      .42449      .48411      .51285      .44895      .34690      .30576      .06274      .55567      .40723      .30816      .12441      .21839      .18979      .33247      .16001      .35416      .07237      .14359      .12959      .32909      .22074      .19744      .17528      .29636      .36833      .16316      .03489      .23452      .27138      .30470      .19528      .31726      .30957      .27545      .20277      .32871      .29396      .38307      .24724      .08673      .10160      .22821      .27593      .04087      .06112      .23257      .18136      .41837      .38092      .14073      .02950      .19641      .22447      .25208      .27659      .22478      .16154      .19355      .14483      .14422      .13577      .22545      .24038      .16167      .19386      .17552      .18494      .16454      .16765      .18387      .11549      .20304      .11521      .18584      .13824      .16802      .15665      .15017      .16347      .16107      .25557      .25255      .22426      .14948      .14945      .21377      .20409      .12988      .09662      .11930      .13522      .16529      .15975      .14018      .11980      .21215      .22567
    14.00000065-01-14                       1.00000 40526.00000    59.00000    55.00000     4.00000     1.00000     1.00000     1.00000      .00000    14.00000     1.00000    52.00000     1.00000     2.00000     1.00000      .00000    18.00000     1.00000     1.00000    30.00000   888.000004        4        5         13    31.00000     7.50000     1.00000     9.50000      .00000      .00000     3.00000      .00000     3.00000     8.00000    12.00000    12.00000    12.00000    12.00000      .00000    12.00000    74.00000    10.00000     3.00000     5.00000     2.00000     7.00000      .00000    28.00000        15.0      .41234    14.00000       219.0       184.0       101.0       164.0        91.0       115.0       236.0       210.0       284.0       317.0       421.0       395.0       572.0       603.0       926.0       725.0      1281.0      1147.0      1262.0      1280.0       434.0       397.0       734.0       718.0       233.0       166.0       273.0       242.0       688.0       750.0        65.0        60.0       234.0       282.0       456.0       404.0       567.0       571.0        51.0        49.0       111.0       154.0       802.0       883.0        37.0        84.0       537.0       671.0       676.0       778.0       815.0       820.0       360.0       328.0       120.0        82.0      1557.0      1152.0       484.0       403.0      2459.0      2471.0      1682.0      1881.0    14.00000065-01-14                    1185.00000  1020.00000  1620.00000  1807.00000  1255.00000  1218.00000   856.00000   716.00000   387.00000   348.00000   179.00000   155.00000   228.00000   215.00000   313.00000   238.00000   320.00000   386.00000   229.00000   287.00000  1061.00000   936.00000  1084.00000  1181.00000   528.00000   611.00000  1249.00000  1371.00000   209.00000   198.00000   122.00000   127.00000   618.00000   715.00000   153.00000   237.00000   952.00000  1134.00000      .38212      .35554      .26512      .23176      .37219      .35978      .42396      .41135      .39086      .37415      .27929      .45200      .42135      .49628      .31770      .31826      .21389      .25207      .36054      .35662      .34171      .38208      .18385      .20396      .09939      .12759      .25548      .26650      .26821      .23298      .26846      .38025      .22836      .28643      .21855      .30608      .29126      .27767      .12947      .23834      .34265      .34263      .24712      .30234      .29279      .18846      .16847      .17341      .29043      .31072      .17457      .24751      .41409      .43265      .25927      .38745      .18158      .21753      .11902      .14063      .16791      .20346      .17724      .15504      .16330      .17350      .22566      .22311      .16271      .16196      .19888      .16578      .10735      .10317      .17783      .14932      .20803      .13393      .13161      .16179      .21563      .27427      .19375      .17112      .21031      .21145      .16078      .16210      .17921      .17939      .28299      .23726      .12809      .15086      .11910      .12078      .15703      .17922      .09594      .13404      .19610      .21113
    17.00000065-01-17                       1.00000 40547.00000    49.00000    47.00000     2.00000     2.00000     1.00000     1.00000      .00000    18.00000     1.00000    55.00000     1.00000     1.00000     1.00000      .00000    16.00000     1.00000     1.00000               888.00000999      999      999             21.00000     6.00000     1.00000     9.00000      .00000      .00000      .00000      .00000      .00000      .00000     3.00000     6.00000      .00000     3.00000     8.00000     8.00000    28.00000     7.00000     3.00000     2.00000     1.00000     7.00000     1.00000    21.00000        20.0      .41605    17.00000       217.0       186.0       112.0       122.0        88.0       102.0       152.0       148.0       292.0       330.0       353.0       369.0       479.0       409.0       808.0       794.0       857.0       805.0      1175.0      1193.0       319.0       340.0       565.0       551.0       202.0       161.0       214.0       154.0       690.0       842.0        86.0        48.0       177.0       197.0       374.0       373.0       489.0       489.0        33.0        38.0       132.0       118.0       842.0       792.0        20.0        82.0       311.0       416.0       634.0       699.0       642.0       642.0       293.0       239.0        73.0        48.0      1260.0      1051.0       379.0       340.0      1544.0      1948.0      1386.0      1573.0    17.00000065-01-17                     993.00000  1006.00000  1467.00000  1797.00000  1073.00000   996.00000   785.00000   809.00000   257.00000   284.00000   199.00000   163.00000   218.00000   214.00000   297.00000   281.00000   309.00000   421.00000   235.00000   309.00000  1254.00000   928.00000   936.00000   940.00000   458.00000   634.00000  1081.00000  1178.00000   142.00000   192.00000    58.00000    77.00000   576.00000   733.00000   107.00000   162.00000   861.00000   986.00000      .33143      .34243      .21151      .25310      .37078      .42765      .35913      .38962      .31933      .38111      .44211      .30640      .52389      .50490      .23258      .33313      .24257      .25873      .32310      .32372      .28273      .28265      .15591      .26260      .15868      .23282      .17147      .26672      .31797      .28153      .19815      .18172      .20797      .21879      .26371      .27695      .22158      .30843      .13156      .24987      .40780      .35699      .28398      .32730      .18145      .21458      .37907      .32897      .29434      .30149      .33170      .38439      .33815      .40111      .18780      .05687      .22978      .23831      .14124      .20430      .20115      .23245      .16666      .15149      .19365      .15130      .21089      .20223      .19468      .18046      .24265      .15589      .14249      .12324      .12881      .19435      .09669      .14314      .10480      .14806      .17318      .17131      .10820      .20407      .21285      .21433      .17864      .16403      .19209      .17504      .23022      .16953      .15723      .11301      .16818      .17678      .18226      .15310      .13771      .14730      .21766      .20195
    18.00000065-01-18                       1.00000 40554.00000    72.00000    68.00000     4.00000     1.00000     1.00000     1.00000      .00000    16.00000     5.00000    71.00000     1.00000     2.00000     1.00000      .00000    16.00000     5.00000     1.00000    47.00000   888.000000        1        0          1     4.00000     6.50000     1.00000     8.50000      .00000      .00000     3.00000      .00000      .00000      .00000      .00000     4.00000      .00000     4.00000     4.00000     8.00000    23.00000     6.00000     3.00000     2.00000     2.00000     8.00000     1.00000    22.00000        17.0      .31605    18.00000       167.0       148.0        89.0       124.0        80.0        88.0       152.0       170.0       272.0       288.0       278.0       309.0       364.0       403.0       643.0       706.0       854.0       968.0       993.0      1035.0       255.0       300.0       564.0       526.0       163.0       126.0       177.0       154.0       675.0       610.0        52.0        47.0       147.0       165.0       309.0       371.0       364.0       303.0        34.0        34.0       124.0       115.0       766.0       688.0         8.0        46.0       345.0       399.0       401.0       562.0       470.0       658.0       244.0       192.0        52.0        62.0      1333.0      1123.0       348.0       395.0      1793.0      2090.0      1579.0      1544.0    18.00000065-01-18                    1042.00000   785.00000  1551.00000  1554.00000  1324.00000  1204.00000   761.00000   716.00000   351.00000   360.00000   192.00000   145.00000   183.00000   208.00000   322.00000   232.00000   350.00000   387.00000   252.00000   303.00000  1254.00000  1115.00000   720.00000   757.00000   421.00000   557.00000  1022.00000  1012.00000   152.00000   121.00000    78.00000    78.00000   687.00000   648.00000    99.00000   144.00000  1004.00000   916.00000      .27637      .23676      .23802      .24626      .33325      .32643      .41383      .34189      .24153      .18210      .08411      .25427      .29578      .35054      .20456      .21242      .14840      .17299      .24373      .31282      .39046      .43492      .15881      .20360      .17340      .17817      .22441      .25914      .32528      .26231      .02721      .16650      .23557      .12960      .17966      .21083      .20630      .15899      .10673      .26949      .30689      .33118      .24667      .19351      .05840      .11324      .20330      .25729      .08358      .09125      .13975      .21926      .37747      .28085      .20892      .34263      .20283      .20488      .16750      .22398      .17101      .19428      .15496      .14532      .14226      .10903      .18758      .17809      .17539      .17126      .15824      .13811      .15763      .11279      .19970      .14665      .12704      .14289      .12965      .14803      .21102      .14456      .14209      .18929      .18664      .16462      .12675      .17657      .18515      .13633      .22558      .19450      .10029      .08883      .10304      .12228      .15289      .11320      .07573      .13321      .18716      .18785
    25.00000065-01-25                       1.00000 40701.00000    58.00000    58.00000      .00000     2.00000     1.00000     5.00000      .00000    18.00000     1.00000    55.00000     3.00000     2.00000     1.00000      .00000    16.00000     1.00000      .00000   888.00000     2.00000999      999      999                        999.00000   999.00000   999.00000   999.00000   999.00000   999.00000   999.00000   999.00000   999.00000   999.00000   999.00000   999.00000   999.00000   999.00000   999.00000   999.00000                                                                           999.00000       999.0      .40323    25.00000       257.0       204.0       153.0       139.0       123.0       127.0       199.0       196.0       399.0       407.0       319.0       382.0       573.0       598.0      1025.0       925.0      1031.0      1020.0      1585.0      1531.0       472.0       446.0       720.0       720.0       236.0       217.0       211.0       232.0       891.0       858.0        42.0        70.0       200.0       223.0       486.0       414.0       541.0       481.0        46.0        40.0       144.0       169.0       926.0       927.0         8.0        50.0       349.0       460.0       493.0       637.0       767.0       985.0       381.0       330.0        83.0        77.0      1329.0      1081.0       508.0       520.0      2294.0      2705.0      1760.0      1861.0    25.00000065-01-25                    1284.00000   964.00000  1730.00000  1989.00000  1278.00000  1168.00000   728.00000   887.00000   383.00000   372.00000   220.00000   180.00000   284.00000   261.00000   367.00000   267.00000   304.00000   393.00000   266.00000   334.00000  1139.00000  1016.00000  1102.00000  1032.00000   626.00000   646.00000  1334.00000  1364.00000   176.00000   182.00000   121.00000   113.00000   820.00000   823.00000   128.00000   207.00000  1157.00000  1190.00000      .27644      .29350      .31903      .26938      .34200      .41002      .45995      .41424      .35494      .25456      .05070      .17200      .29443      .45095      .30453      .29992      .13358      .18717      .27976      .32342      .31971      .35612      .29810      .28562      .18249      .28535      .17677      .19391      .22595      .24289      .02974      .06350      .23700      .12981      .25422      .19022      .29952      .23138      .17570      .17704      .36105      .30514      .21596      .22164      .03633      .09005      .06985      .06924      .10112      .07463      .13653      .22222      .38675      .36929      .09570      .30137      .17963      .24840      .22185      .20308      .16230      .15363      .14002      .15007      .16369      .16451      .20464      .19830      .17681      .16416      .16203      .13064      .19143      .14464      .21154      .23160      .17121      .20316      .13922      .11987      .19785      .19890      .12024      .14651      .16600      .16025      .14737      .16636      .16818      .15412      .17707      .13436      .13618      .12134      .16530      .12054      .14292      .15657      .12156      .12952      .19615      .17780
    34.00000065-01-34                       1.00000 40885.00000    45.00000    43.00000     2.00000     1.00000     1.00000     1.00000      .00000    12.00000     1.00000    42.00000     1.00000     2.00000     1.00000      .00000   999.00000     1.00000     1.00000    13.00000   888.000000        1        0          1    26.00000     8.50000     2.00000    10.50000     6.00000     2.00000     8.00000     4.00000     6.00000    12.00000    12.00000    12.00000     8.00000    12.00000    12.00000     8.00000   102.00000                                                                            25.00000        23.0     1.45486    34.00000       192.0       228.0       125.0       153.0       110.0       102.0       250.0       240.0       325.0       306.0       316.0       407.0       416.0       418.0       881.0       741.0       957.0       892.0      1179.0      1222.0       334.0       375.0       592.0       633.0       210.0       184.0       250.0       194.0       767.0       780.0        57.0        61.0       254.0       232.0       520.0       439.0       525.0       531.0        55.0        44.0       119.0       152.0       982.0      1028.0        14.0        44.0       335.0       461.0       483.0       678.0       726.0       825.0       319.0       296.0        67.0        62.0      1314.0      1106.0       434.0       405.0      2045.0      2225.0      1601.0      1591.0    34.00000065-01-34                    1288.00000  1005.00000  1586.00000  1721.00000  1199.00000  1289.00000   954.00000   980.00000   340.00000   333.00000   238.00000   208.00000   272.00000   309.00000   348.00000   256.00000   366.00000   457.00000   239.00000   313.00000  1101.00000  1057.00000  1126.00000  1153.00000   616.00000   596.00000  1341.00000  1272.00000   167.00000   141.00000   114.00000    93.00000   785.00000   742.00000   126.00000   206.00000  1056.00000  1210.00000      .33185      .33744      .26333      .28585      .29126      .30215      .41470      .39056      .45018      .49356      .04951      .17209      .41255      .48745      .35962      .35554      .20815      .20279      .34889      .36869      .40050      .41036      .36978      .30693      .13112      .24802      .32785      .21994      .32714      .28441      .06370      .15066      .21250      .19986      .25808      .19832      .27088      .31036      .08890      .05618      .28258      .36513      .26109      .24127      .04011      .06967      .35141      .29060      .22734      .21941      .14425      .17664      .48974      .49349      .43069      .40775      .27366      .27301      .23342      .24593      .22882      .24239      .17521      .20783      .18950      .19702      .21887      .25828      .20301      .17810      .16651      .14686      .15202      .19605      .24185      .19755      .21260      .21633      .12049      .16667      .21773      .26988      .15254      .16797      .18389      .15238      .14314      .16847      .14975      .13731      .19870      .16392      .15616      .17355      .16184      .12100      .17613      .12729      .11424      .20961      .19979      .18547
    38.00000065-01-38                       1.00000 40938.00000    68.00000    66.00000     2.00000     2.00000     1.00000     1.00000      .00000    15.00000     1.00000    70.00000     1.00000     1.00000     1.00000      .00000    12.00000     1.00000     1.00000    43.00000   888.000004        2        1          7    19.00000     7.00000     1.00000     9.00000      .00000      .00000      .00000      .00000      .00000     4.00000     4.00000     3.00000      .00000     4.00000      .00000     1.00000    16.00000     8.00000     3.00000     2.00000      .00000     8.00000     1.00000    22.00000        19.0     1.29032    38.00000       224.0       175.0       143.0       136.0        96.0       128.0       169.0       192.0       309.0       336.0       341.0       347.0       462.0       486.0       867.0       748.0      1068.0      1046.0      1288.0      1184.0       365.0       342.0       791.0       700.0       215.0       175.0       222.0       200.0       718.0       616.0        53.0        46.0       241.0       262.0       474.0       426.0       509.0       483.0        60.0        54.0       142.0       175.0       851.0       878.0        33.0        45.0       359.0       471.0       598.0       671.0       829.0       915.0       302.0       285.0        98.0        59.0      1381.0       913.0       505.0       479.0      2433.0      2611.0      1917.0      1786.0    38.00000065-01-38                    1296.00000  1119.00000  1458.00000  1741.00000  1142.00000  1022.00000   787.00000   888.00000   348.00000   362.00000   195.00000   180.00000   281.00000   223.00000   380.00000   263.00000   319.00000   413.00000   306.00000   309.00000  1152.00000  1009.00000  1021.00000  1098.00000   616.00000   674.00000  1259.00000  1252.00000   222.00000   198.00000   113.00000    98.00000   598.00000   713.00000   127.00000   194.00000   956.00000  1029.00000      .33272      .32495      .36368      .17502      .43397      .39151      .49914      .42272      .47639      .46186      .11660      .25526      .49345      .54282      .36345      .34635      .12551      .18217      .32972      .36003      .37889      .37400      .24204      .24939      .14637      .24670      .31813      .32359      .29483      .32324      .10450      .18310      .17469      .23314      .28989      .30132      .23358      .26711      .17868      .22443      .34888      .30429      .25682      .27026      .15106      .15332      .05204      .07796      .22292      .19902      .34198      .34026      .42163      .43376      .31564      .43721      .25239      .28943      .19010      .19752      .15207      .15981      .12720      .13045      .12770      .16934      .22859      .25093      .25223      .23102      .17201      .15386      .13942      .15700      .18472      .21435      .18533      .17406      .14490      .18107      .20731      .20482      .17433      .23199      .18624      .19145      .16345      .20692      .16191      .14533      .24368      .19291      .11052      .16205      .08497      .14446      .15738      .14722      .10406      .07378      .19789      .20801
    42.00000065-01-42                       1.00000 40953.00000    67.00000    64.00000     3.00000     2.00000     1.00000     1.00000      .00000    18.00000     1.00000    74.00000     1.00000     1.00000     1.00000      .00000    18.00000     1.00000     1.00000    20.00000   888.000000        2        0          2    19.00000     7.50000     1.00000     9.50000     3.00000     1.00000     4.00000      .00000      .00000     8.00000     4.00000    12.00000      .00000     4.00000      .00000    12.00000    48.00000                                                                            27.00000        19.0      .38369    42.00000       169.0       150.0       108.0        90.0        78.0        94.0       143.0       158.0       242.0       253.0       360.0       394.0       403.0       491.0       783.0       754.0       908.0      1098.0      1264.0      1418.0       378.0       353.0       672.0       672.0       181.0       139.0       242.0       176.0       727.0       679.0        72.0        74.0       204.0       186.0       372.0       407.0       425.0       446.0        40.0        42.0        86.0       106.0       812.0       743.0        30.0        62.0       422.0       500.0       733.0       771.0       744.0       828.0       257.0       246.0        79.0        65.0      1398.0      1032.0       437.0       390.0      1984.0      2509.0      1568.0      1902.0    42.00000065-01-42                    1001.00000  1104.00000  1637.00000  1864.00000  1216.00000  1052.00000   853.00000   854.00000   276.00000   311.00000   186.00000   136.00000   238.00000   215.00000   259.00000   246.00000   321.00000   351.00000   199.00000   284.00000  1168.00000   934.00000   873.00000   897.00000   472.00000   542.00000  1119.00000  1137.00000   160.00000   120.00000    84.00000    77.00000   638.00000   628.00000    84.00000   138.00000   920.00000  1055.00000      .35605      .36479      .31541      .27972      .36251      .33152      .56876      .43210      .42117      .30598      .41434      .42097      .53897      .48485      .32126      .30952      .21723      .20548      .32032      .30358      .29125      .33708      .23363      .20916      .17636      .18136      .12879      .13798      .25359      .22369      .31535      .37010      .17637      .17695      .27400      .20681      .29726      .24301      .11341      .12392      .35302      .34668      .30079      .21276      .13390      .14012      .21286      .19788      .20433      .19256      .29105      .26939      .42424      .40175      .41872      .44985      .17698      .19689      .16117      .13975      .18415      .17611      .15784      .14671      .16081      .15547      .15868      .18411      .16935      .17851      .14763      .12693      .09834      .15114      .19024      .13874      .18968      .13309      .15063      .14781      .22783      .25524      .17124      .15302      .15963      .19584      .19066      .18527      .13204      .14002      .18138      .19797      .10944      .08059      .07715      .12788      .11435      .14301      .09396      .08834      .20236      .20675
    47.00000065-01-47                       1.00000 41051.00000    63.00000    61.00000     2.00000     2.00000     1.00000     1.00000      .00000    16.00000     1.00000    63.00000     1.00000     1.00000     1.00000      .00000    12.00000     1.00000     1.00000    42.00000   888.000000        2        1          3                 3.00000      .50000     4.50000      .00000      .00000      .00000      .00000      .00000      .00000     8.00000     1.00000      .00000     8.00000      .00000      .00000    17.00000    10.00000     3.00000     5.00000     3.00000     8.00000     1.00000    30.00000         1.0      .69235    47.00000       107.0        83.0        76.0        78.0        62.0        58.0       101.0        78.0       223.0       279.0       435.0       408.0       448.0       483.0       628.0       580.0      1020.0       790.0      1015.0       934.0       299.0       257.0       468.0       482.0       201.0       155.0       185.0       243.0       551.0       544.0        72.0        52.0       147.0       147.0       316.0       323.0       435.0       387.0        31.0        27.0        82.0       100.0       530.0       577.0        24.0        90.0       403.0       458.0       467.0       571.0       560.0       627.0       319.0       327.0        60.0        46.0       876.0       812.0       320.0       259.0      1708.0      1978.0      1533.0      1427.0    47.00000065-01-47                    1002.00000   828.00000  1137.00000  1380.00000   909.00000   847.00000   600.00000   624.00000   195.00000   211.00000   128.00000   119.00000   186.00000   202.00000   288.00000   196.00000   215.00000   287.00000   185.00000   189.00000   745.00000   675.00000   784.00000   845.00000   420.00000   394.00000   946.00000   841.00000   138.00000   115.00000    75.00000    58.00000   559.00000   538.00000   114.00000   130.00000   647.00000   776.00000      .31407      .35470      .27859      .30438      .36662      .46588      .57126      .63410      .31256      .32354      .39191      .32512      .42841      .45170      .32279      .35482      .18215      .19639      .30035      .32719      .38321      .36457      .08266      .10499      .10288      .18908      .12486      .17464      .21549      .27242      .19855      .27439      .21494      .25983      .19506      .31008      .25407      .16821      .17138      .19344      .39324      .36461      .23965      .33826      .27012      .17873      .27843      .31325      .12021      .20325      .36192      .34121      .29414      .38621      .28828      .36928      .26576      .28680      .13633      .16062      .17342      .18533      .14689      .16076      .18975      .18024      .20459      .20357      .16343      .16405      .17600      .16122      .15723      .14746      .23364      .17368      .10994      .10713      .08890      .11182      .29855      .37099      .10524      .11744      .19765      .18122      .22631      .19901      .16772      .16603      .22914      .22713      .08844      .09527      .10685      .08702      .14207      .17992      .07539      .12985      .25200      .23536
    57.00000065-01-57                       1.00000 41211.00000    69.00000    64.00000     5.00000     2.00000     2.00000     3.00000      .00000    18.00000     1.00000    50.00000     2.00000     2.00000     1.00000      .00000    18.00000     1.00000     1.00000   888.00000   888.00000999      999      999             31.00000     9.00000     2.00000    11.00000      .00000      .00000      .00000      .00000      .00000     6.00000     4.00000     9.00000     3.00000     8.00000      .00000    12.00000    42.00000    10.00000     3.00000     5.00000     3.00000     8.00000     1.00000    30.00000        23.0      .37627    57.00000       250.0       226.0       110.0       112.0        98.0       134.0       184.0       194.0       345.0       360.0       365.0       377.0       530.0       488.0       784.0       679.0       867.0       999.0      1120.0      1095.0       363.0       269.0       535.0       557.0       222.0       145.0       177.0       157.0       604.0       633.0        44.0        45.0       176.0       203.0       385.0       369.0       531.0       445.0        43.0        45.0       153.0       141.0       917.0       828.0        30.0        47.0       365.0       417.0       538.0       624.0       669.0       690.0       291.0       304.0        73.0        44.0      1026.0       871.0       432.0       385.0      2020.0      2323.0      1351.0      1540.0    57.00000065-01-57                    1188.00000  1044.00000  1483.00000  1649.00000  1019.00000   897.00000   602.00000   738.00000   278.00000   300.00000   205.00000   158.00000   203.00000   250.00000   325.00000   247.00000   315.00000   389.00000   232.00000   246.00000  1008.00000   827.00000   968.00000  1029.00000   546.00000   584.00000  1101.00000  1191.00000   179.00000   175.00000   106.00000    80.00000   492.00000   556.00000   139.00000   183.00000   927.00000  1063.00000      .27677      .28295      .31319      .23617      .37018      .33903      .40478      .32996      .36102      .40367      .11686      .11272      .36918      .46960      .28701      .36639      .18757      .19072      .35120      .36676      .33650      .36157      .20036      .24795      .18779      .17484      .21699      .27731      .19704      .29389      .19739      .13800      .21728      .29420      .26910      .28477      .28897      .29203      .23924      .22923      .28472      .28602      .21614      .19126      .12644      .09604      .17735      .24009      .31910      .33930      .32467      .27138      .37079      .36283      .20009      .26869      .15315      .20111      .16881      .19238      .20048      .18993      .15068      .17223      .13742      .13704      .20874      .21179      .18709      .20510      .12534      .16337      .16777      .20926      .15542      .23203      .12508      .14150      .09976      .12424      .20265      .16968      .09952      .22318      .16521      .19236      .18440      .14335      .18202      .17870      .17898      .20229      .11245      .11467      .13382      .12051      .18428      .11438      .13666      .16133      .18534      .19079
    58.00000065-01-58                       1.00000 41289.00000    75.00000    60.00000    15.00000     2.00000     1.00000     1.00000      .00000    16.00000     1.00000    78.00000     1.00000     1.00000     1.00000      .00000    18.00000     1.00000     1.00000    55.00000   888.000004        6        1         11                 8.00000     1.00000    10.00000      .00000      .00000      .00000      .00000      .00000      .00000     4.00000     8.00000     4.00000      .00000      .00000     8.00000    24.00000     5.00000     3.00000      .00000     2.00000     6.00000      .00000    16.00000       999.0      .37234    58.00000       244.0       188.0       117.0       143.0        92.0       114.0       181.0       187.0       259.0       326.0       414.0       368.0       399.0       380.0       721.0       608.0       982.0      1011.0      1122.0       989.0       403.0       318.0       817.0       626.0       213.0       150.0       188.0       139.0       833.0       820.0        54.0        52.0       229.0       222.0       334.0       371.0       429.0       463.0        48.0        37.0       161.0       163.0       958.0       866.0        36.0        36.0       523.0       606.0       610.0       600.0       871.0       795.0       209.0       251.0        70.0        39.0      1448.0      1440.0       492.0       476.0      2053.0      2912.0      1877.0      2147.0    58.00000065-01-58                    1251.00000  1132.00000  1753.00000  2011.00000  1277.00000  1300.00000  1071.00000  1040.00000   349.00000   371.00000   185.00000   138.00000   210.00000   191.00000   272.00000   251.00000   329.00000   400.00000   258.00000   265.00000  1410.00000  1002.00000   900.00000   946.00000   483.00000   637.00000  1233.00000  1280.00000   157.00000   168.00000    88.00000    95.00000   761.00000   826.00000   101.00000   169.00000   957.00000   990.00000      .34674      .37034      .27708      .33909      .46556      .43367      .27798      .30377      .36183      .40313      .39639      .26977      .54688      .51942      .20184      .13004      .19414      .17159      .37611      .36237      .36356      .31767      .15094      .12370      .15908      .25597      .19428      .17706      .21988      .25475      .40344      .27072      .17970      .23611      .23406      .16018      .22165      .27326      .21978      .22350      .38986      .40304      .32534      .32124      .10644      .13811      .19699      .16651      .11588      .11881      .20742      .15491      .33160      .37095      .04279      .14567      .21065      .19820      .15204      .20057      .23841      .18384      .15265      .12714      .15905      .13705      .19716      .19158      .14708      .19100      .18120      .15970      .12715      .12672      .14454      .13766      .14534      .19223      .10844      .12522      .16227      .17474      .12286      .18804      .21248      .20625      .23085      .20409      .15050      .16097      .23572      .20411      .14960      .14561      .16419      .20045      .13287      .11796      .16119      .10620      .19090      .20937
    61.00000065-01-61                       1.00000 41403.00000    42.00000    36.00000     6.00000     2.00000     1.00000     1.00000      .00000    16.00000     5.00000    43.00000     1.00000     1.00000     1.00000      .00000    16.00000     1.00000     1.00000    16.00000   888.000002        9        7         18    30.00000     9.50000     1.00000    12.50000      .00000      .00000     8.00000     3.00000     8.00000      .00000    12.00000    12.00000      .00000    12.00000    12.00000    12.00000    79.00000     4.00000     3.00000     2.00000      .00000     8.00000      .00000    17.00000        24.0      .83017    61.00000       227.0       211.0        79.0       128.0        93.0       101.0       127.0       117.0       237.0       238.0       327.0       353.0       460.0       516.0       732.0       563.0       888.0       743.0      1223.0      1150.0       300.0       288.0       555.0       456.0       196.0       131.0       210.0       203.0       562.0       581.0        52.0        51.0       137.0       146.0       356.0       339.0       357.0       362.0        19.0        25.0       129.0       136.0       654.0       637.0        36.0        52.0       403.0       445.0       535.0       648.0       596.0       672.0       250.0       272.0        91.0        71.0      1039.0       843.0       310.0       322.0      1751.0      2001.0      1471.0      1482.0    61.00000065-01-61                     946.00000   830.00000  1286.00000  1532.00000   807.00000   766.00000   580.00000   676.00000   225.00000   279.00000   127.00000   114.00000   188.00000   157.00000   235.00000   201.00000   237.00000   245.00000   208.00000   215.00000   878.00000   614.00000   802.00000   769.00000   403.00000   436.00000   973.00000   860.00000   125.00000   132.00000    68.00000    72.00000   405.00000   526.00000    96.00000   150.00000   675.00000   735.00000      .20512      .22313      .34777      .29266      .35015      .40459      .40482      .42887      .34123      .33223      .27897      .29659      .48540      .45221      .31950      .34946      .15059      .19860      .29945      .31185      .33050      .25281      .18468      .14797      .15507      .14316      .17210      .16819      .20155      .18165      .24536      .22186      .17866      .15511      .26950      .22659      .12182      .21477      .19427      .26052      .34265      .34050      .27788      .23737      .18606      .16643      .23797      .25319      .26874      .23013      .30078      .32080      .42190      .38225      .27555      .29298      .16214      .18732      .15948      .20408      .16941      .18553      .12652      .12323      .12666      .13649      .18210      .20084      .17191      .19422      .12391      .14611      .13440      .17354      .16745      .13782      .22463      .17631      .12433      .10118      .16849      .11599      .15966      .23093      .13633      .20858      .17290      .21428      .13173      .14133      .16353      .21624      .08251      .08644      .10650      .15250      .16156      .14511      .11270      .11850      .20394      .20460
     1.00000065-02-01                       2.00000 40225.00000    60.00000    57.00000     3.00000     1.00000     1.00000     1.00000      .00000    18.00000     1.00000    56.00000     1.00000     2.00000     1.00000      .00000    16.00000     1.00000     1.00000   999.00000   888.00000999      999      999               .00000     3.00000      .50000     3.00000      .00000      .00000      .00000      .00000     2.00000      .00000      .00000      .00000      .00000      .00000      .00000      .00000     2.00000     8.00000     3.00000     5.00000     1.00000     8.00000      .00000    25.00000         8.0     1.51420     1.00000       167.0       158.0        73.0       124.0        82.0        95.0       178.0       160.0       214.0       252.0       343.0       427.0       491.0       528.0       841.0       603.0       933.0       985.0      1256.0      1188.0       382.0       296.0       718.0       651.0       205.0       174.0       220.0       159.0       645.0       609.0        52.0        55.0       181.0       212.0       410.0       399.0       493.0       457.0        50.0        46.0        94.0       102.0       653.0       637.0        34.0        44.0       487.0       566.0       670.0       777.0       707.0       756.0       290.0       241.0        83.0        55.0      1382.0      1128.0       430.0       400.0      2213.0      2627.0      1645.0      1765.0     1.00000065-02-01                    1037.00000   911.00000  1568.00000  1893.00000  1259.00000  1054.00000   868.00000   850.00000   326.00000   346.00000   206.00000   167.00000   247.00000   238.00000   299.00000   239.00000   332.00000   488.00000   235.00000   242.00000  1027.00000   810.00000   857.00000   878.00000   472.00000   589.00000   993.00000  1151.00000   137.00000   180.00000    95.00000   100.00000   634.00000   546.00000   142.00000   174.00000   842.00000   962.00000      .37774      .29263      .34060      .17173      .30642      .28057      .49159      .50620      .40346      .41184      .36746      .39614      .53992      .47381      .28847      .29279      .25383      .25460      .31002      .28564      .32846      .31326      .30272      .26412      .13445      .31050      .13910      .23334      .27794      .29445      .51003      .43433      .21832      .31278      .25953      .31987      .17507      .13549      .22076      .23237      .41291      .38765      .24817      .29375      .11534      .12863      .35360      .37392      .28338      .31139      .45823      .41156      .29959      .34930      .10492      .31993      .16013      .19940      .18856      .22054      .23677      .21881      .18470      .15744      .18578      .18861      .20239      .21057      .16376      .16251      .16618      .14469      .13575      .14060      .18332      .19871      .24824      .14171      .12813      .16329      .14088      .15977      .17606      .25290      .15289      .20297      .23376      .18441      .16494      .16469      .22135      .20984      .20770      .16613      .21250      .15781      .15637      .16470      .14154      .11081      .23502      .28087
     4.00000065-02-04                       2.00000 40344.00000    55.00000    51.00000     4.00000     1.00000   999.00000     1.00000      .00000    12.00000     1.00000    54.00000     1.00000     2.00000     1.00000      .00000    14.00000     1.00000     1.00000   999.00000   888.000000        0        0          2     6.00000     5.00000     1.00000     6.00000      .00000      .00000      .00000     6.00000     3.00000      .00000     1.00000     1.00000     4.00000      .00000      .00000      .00000    15.00000     6.00000     2.00000     1.00000      .00000     6.00000      .00000    15.00000        21.0     2.24710     4.00000       241.0       212.0       100.0       134.0        97.0       124.0       235.0       204.0       410.0       403.0       400.0       405.0       445.0       569.0       937.0       841.0      1075.0      1171.0      1391.0      1418.0       320.0       325.0       737.0       736.0       247.0       187.0       189.0       181.0       688.0       659.0        63.0        48.0       238.0       251.0       460.0       484.0       588.0       541.0        50.0        57.0       132.0       147.0      1141.0      1099.0        14.0        78.0       375.0       531.0       620.0       831.0       585.0       797.0       255.0       254.0        64.0        48.0      1119.0       949.0       451.0       446.0      2108.0      2671.0      1841.0      2323.0     4.00000065-02-04                    1373.00000  1115.00000  1605.00000  2013.00000  1213.00000  1115.00000   689.00000   827.00000   329.00000   362.00000   234.00000   201.00000   301.00000   252.00000   363.00000   290.00000   342.00000   397.00000   312.00000   341.00000  1163.00000  1089.00000  1080.00000  1183.00000   593.00000   637.00000  1376.00000  1294.00000   187.00000   168.00000   102.00000   101.00000   592.00000   609.00000   130.00000   208.00000  1163.00000  1211.00000      .30695      .28372      .26648      .25099      .39393      .37158      .43847      .46655      .44147      .38101      .28771      .39446      .48326      .51463      .34608      .32963      .28896      .28012      .35194      .31314      .35820      .36832      .29488      .27901      .12529      .28011      .33374      .20989      .34368      .30528      .30194      .27934      .35123      .29361      .33867      .29207      .27848      .24274      .26803      .31884      .31342      .28437      .24869      .23046      .04459      .21052      .35366      .41977      .29555      .29891      .15509      .29238      .47199      .40567      .25828      .19071      .26431      .25071      .25798      .23950      .24735      .20593      .17972      .20144      .17541      .19001      .26300      .19862      .20461      .15177      .16150      .16426      .20098      .16496      .22540      .16677      .17242      .15605      .16694      .16568      .18371      .22207      .11667      .19963      .15505      .20619      .17784      .20923      .19822      .21096      .19770      .20917      .22017      .18132      .24571      .18477      .22233      .18425      .15763      .12801      .17695      .20377
     5.00000065-02-05                       2.00000 40351.00000    56.00000    52.00000     4.00000     2.00000     1.00000     3.00000      .00000    13.00000     1.00000    28.00000     2.00000     2.00000     5.00000      .00000    17.00000     1.00000     1.00000   888.00000   888.00000999      999      999             22.00000     4.50000     1.00000     6.50000     6.00000      .00000      .00000     8.00000      .00000      .00000     8.00000     2.00000      .00000      .00000     4.00000      .00000    28.00000                                                                           999.00000        13.0     1.77660     5.00000       153.0       163.0        95.0       118.0        76.0        92.0       130.0       162.0       214.0       235.0       250.0       238.0       320.0       292.0       651.0       625.0       948.0       897.0      1037.0      1051.0       309.0       234.0       606.0       579.0       166.0       136.0       173.0       174.0       591.0       673.0        28.0        44.0       217.0       192.0       381.0       320.0       431.0       391.0        32.0        36.0        94.0       120.0       648.0       664.0         7.0        43.0       351.0       492.0       450.0       584.0       738.0       811.0       189.0       183.0        94.0        41.0       970.0      1013.0       304.0       307.0      1858.0      2340.0      1766.0      1740.0     5.00000065-02-05                    1165.00000  1009.00000  1418.00000  1695.00000  1059.00000   925.00000   603.00000   785.00000   221.00000   285.00000   174.00000   131.00000   185.00000   153.00000   272.00000   223.00000   265.00000   322.00000   191.00000   218.00000   838.00000   778.00000   775.00000   860.00000   427.00000   493.00000  1041.00000  1028.00000   145.00000   144.00000    77.00000    93.00000   619.00000   600.00000    69.00000   151.00000   683.00000   863.00000      .42014      .37996      .33075      .32824      .47767      .49341      .42586      .40585      .49990      .41371      .18535      .19129      .53870      .46925      .31545      .19461      .23569      .25444      .35116      .30161      .32831      .23436      .28860      .25259      .20204      .12984      .33210      .30618      .34434      .38430      .11178      .10949      .29377      .17324      .27968      .26274      .33358      .36359      .07339      .20299      .41222      .40614      .33085      .32276      .13166      .28867      .32064      .31298      .21953      .17392      .35045      .31033      .48274      .49148      .14598      .05182      .25353      .22154      .13641      .14209      .21847      .21661      .19096      .17390      .19936      .16192      .20295      .22234      .18051      .21415      .18461      .16141      .09511      .10172      .21584      .17930      .11886      .10630      .13115      .14535      .28006      .20275      .14930      .28317      .27902      .26825      .23722      .22722      .22227      .22282      .30522      .27615      .19439      .11811      .16034      .18519      .17182      .16974      .11432      .20766      .19591      .21199
    19.00000065-02-19                       2.00000 40568.00000    55.00000    51.00000     4.00000     1.00000     1.00000     1.00000      .00000    16.00000     5.00000    50.00000     1.00000     2.00000     1.00000      .00000    16.00000     1.00000     1.00000   999.00000   888.000001        1        0          2     4.00000     4.50000     1.00000     5.50000      .00000      .00000      .00000     1.00000      .00000      .00000      .00000     2.00000      .00000     4.00000     6.00000     8.00000    21.00000     6.00000     3.00000     1.00000      .00000     8.00000      .00000    18.00000        18.0     1.12228    19.00000       173.0       176.0       114.0       125.0       100.0       125.0       160.0       159.0       261.0       288.0       375.0       347.0       480.0       409.0       812.0       728.0      1009.0      1012.0      1193.0      1049.0       331.0       364.0       613.0       573.0       246.0       198.0       252.0       184.0       562.0       637.0        53.0        47.0       248.0       224.0       426.0       429.0       505.0       548.0        48.0        45.0       125.0       139.0       820.0       838.0        19.0        80.0       333.0       473.0       479.0       602.0       793.0       817.0       378.0       344.0       120.0        77.0      1193.0       967.0       389.0       336.0      1891.0      2438.0      1439.0      1678.0    19.00000065-02-19                    1115.00000   991.00000  1569.00000  2057.00000  1142.00000  1053.00000   733.00000   687.00000   319.00000   346.00000   206.00000   168.00000   287.00000   244.00000   314.00000   274.00000   282.00000   323.00000   210.00000   278.00000   912.00000   949.00000  1019.00000  1120.00000   542.00000   628.00000  1050.00000  1255.00000   196.00000   180.00000    80.00000    91.00000   564.00000   637.00000   135.00000   155.00000   965.00000   996.00000      .33810      .26815      .35029      .35634      .35763      .38015      .51493      .51392      .51360      .41470      .36226      .29026      .54212      .43393      .28452      .37194      .30462      .26596      .33491      .31400      .33538      .31296      .18446      .21468      .22606      .23354      .32279      .24647      .28557      .33330      .21788      .14407      .27248      .24816      .34855      .33585      .31240      .36161      .17722      .09122      .31392      .26414      .24687      .18046      .17895      .23350      .40971      .37252      .36552      .34230      .40229      .39227      .37019      .39139      .38141      .21259      .22005      .26159      .17721      .14575      .23328      .23883      .21564      .21646      .22491      .21893      .24326      .25369      .22187      .19991      .20403      .18932      .15783      .11834      .27294      .09372      .30084      .13068      .18202      .14703      .21309      .12337      .13022      .18635      .16808      .22384      .18686      .22674      .18534      .16052      .19097      .17473      .13533      .17698      .20060      .27276      .14865      .21623      .12532      .11497      .22175      .25242
    21.00000065-02-21                       2.00000 40645.00000    56.00000    54.00000     2.00000     2.00000     2.00000     1.00000      .00000    15.00000     1.00000    66.00000     1.00000     1.00000     1.00000      .00000    17.00000     1.00000     1.00000   999.00000   888.000000        0        2          2     1.00000     4.50000     1.00000     4.50000      .00000      .00000      .00000     2.00000     3.00000      .00000      .00000      .00000      .00000      .00000      .00000      .00000     5.00000    10.00000     3.00000     5.00000     2.00000      .00000      .00000    28.00000        11.0     2.70460    21.00000       218.0       179.0        97.0       108.0       113.0       131.0       193.0       176.0       334.0       324.0       275.0       300.0       355.0       435.0       495.0       731.0      1036.0      1009.0      1137.0      1286.0       274.0       316.0       793.0       672.0       199.0       172.0       187.0       176.0       690.0       701.0        51.0        38.0       212.0       241.0       387.0       445.0       548.0       508.0        31.0        51.0       126.0       155.0       792.0       873.0        10.0        42.0       375.0       477.0       510.0       697.0       538.0       879.0       224.0       292.0        38.0        56.0      1518.0       999.0       451.0       456.0      2315.0      2544.0      1745.0      1817.0    21.00000065-02-21                    1311.00000  1003.00000  1575.00000  1852.00000  1171.00000  1114.00000   950.00000   900.00000   384.00000   390.00000   201.00000   156.00000   144.00000   234.00000   315.00000   246.00000   358.00000   379.00000   234.00000   309.00000  1087.00000  1006.00000   998.00000  1109.00000   559.00000   542.00000  1197.00000  1160.00000   190.00000   161.00000    91.00000   100.00000   780.00000   763.00000   127.00000   163.00000   960.00000  1054.00000      .36805      .36424      .14272      .12922      .29185      .24161      .31258      .31726      .42127      .39339      .11230      .37864      .45887      .46257      .10800      .26815      .22234      .27191      .34213      .35495      .31386      .41657      .29179      .35573      .22570      .21238      .29553      .18941      .36104      .24946      .08326      .16599      .32453      .29527      .26752      .25370      .31573      .30390      .14320      .31515      .40839      .36971      .35129      .25918      .11764      .24531      .20746      .17622      .09746      .11522      .16321      .28637      .49562      .37154      .04057      .13279      .22330      .22791      .18957      .22658      .20509      .23631      .14001      .17145      .16268      .20827      .20076      .22557      .17521      .19802      .16249      .13067      .19413      .13740      .21497      .15827      .15773      .17799      .19787      .15943      .26183      .24774      .18680      .20846      .20131      .20521      .12575      .19866      .23646      .21683      .23072      .26176      .18482      .20513      .25190      .26420      .16575      .16993      .12440      .12567      .20001      .19207
    22.00000065-02-22                       2.00000 40652.00000    61.00000    54.00000     7.00000     2.00000     1.00000     1.00000      .00000    18.00000     1.00000    73.00000     1.00000     1.00000     1.00000     1.00000    18.00000     1.00000     1.00000    32.00000   888.000000        0        0          0      .00000     5.00000     1.00000     6.00000      .00000      .00000      .00000      .00000      .00000      .00000      .00000      .00000      .00000      .00000      .00000      .00000      .00000                                                                           999.00000        17.0     3.99834    22.00000       153.0       152.0        95.0       127.0        61.0        70.0       143.0       141.0       207.0       215.0       248.0       247.0       286.0       287.0       483.0       491.0       897.0       914.0       847.0       787.0       201.0       198.0       481.0       401.0       163.0       117.0       120.0       152.0       550.0       541.0        32.0        36.0       199.0       191.0       293.0       333.0       434.0       373.0        36.0        32.0        81.0       113.0       659.0       627.0        11.0        40.0       308.0       382.0       376.0       412.0       401.0       478.0       184.0       187.0        33.0        20.0      1236.0       910.0       337.0       411.0      1767.0      2102.0      1446.0      1759.0    22.00000065-02-22                    1169.00000   987.00000  1421.00000  1493.00000  1112.00000   920.00000   750.00000   880.00000   269.00000   301.00000   180.00000   163.00000   189.00000   188.00000   222.00000   230.00000   284.00000   402.00000   190.00000   175.00000  1011.00000   799.00000   881.00000   883.00000   405.00000   442.00000   926.00000   926.00000   159.00000   140.00000   100.00000    66.00000   662.00000   646.00000   106.00000   145.00000   766.00000   827.00000      .36575      .39224      .34331      .29242      .52147      .49000      .41614      .41829      .33933      .41195      .14869      .15660      .34693      .43888      .18483      .31301      .22817      .23794      .22665      .26829      .09761      .17721      .24598      .25044      .21800      .33428      .16675      .27120      .40262      .36994      .05021      .07720      .23322      .26379      .15921      .30794      .37618      .35925      .23819      .23366      .37189      .37000      .32388      .34061      .12991      .10962      .39098      .35435      .16433      .19522      .20238      .19817      .27019      .43506      .03448      .03880      .18631      .20526      .24237      .29706      .20618      .22766      .17365      .17522      .19324      .17005      .25534      .24769      .20468      .17022      .17267      .15021      .14208      .17368      .20932      .24995      .18241      .14264      .14507      .16054      .21609      .14275      .18670      .28818      .14807      .17885      .21399      .21841      .13691      .19430      .24611      .24435      .07186      .10802      .08196      .13280      .14940      .17284      .09404      .12517      .18505      .23204
    28.00000065-02-28                       2.00000 40750.00000    55.00000    51.00000     4.00000     2.00000     1.00000     1.00000      .00000    18.00000     1.00000    66.00000     1.00000     1.00000     1.00000      .00000    18.00000     1.00000     1.00000    12.00000   888.000000        0        0          0    10.00000     4.50000     1.00000     5.00000      .00000      .00000      .00000      .00000      .00000      .00000      .00000      .00000      .00000      .00000      .00000      .00000      .00000     7.00000     3.00000     5.00000     2.00000     8.00000     1.00000    26.00000        14.0     3.78039    28.00000       201.0       159.0       103.0       116.0        91.0       108.0       163.0       147.0       349.0       307.0       481.0       420.0       481.0       494.0      1015.0       786.0       833.0       954.0      1056.0      1183.0       352.0       329.0       630.0       586.0       231.0       157.0       262.0       205.0       552.0       667.0        53.0        60.0       208.0       216.0       444.0       437.0       573.0       514.0        51.0        28.0       124.0       175.0       747.0       764.0        19.0        91.0       342.0       410.0       513.0       627.0       733.0       840.0       325.0       302.0        82.0        91.0      1199.0       953.0       409.0       377.0      1684.0      2109.0      1254.0      1412.0    28.00000065-02-28                    1023.00000  1018.00000  1128.00000  1340.00000  1072.00000   992.00000   679.00000   826.00000   324.00000   350.00000   205.00000   180.00000   257.00000   191.00000   330.00000   262.00000   314.00000   390.00000   255.00000   289.00000  1095.00000  1031.00000  1008.00000   993.00000   458.00000   474.00000  1111.00000  1113.00000   159.00000   151.00000    71.00000    79.00000   628.00000   688.00000    77.00000   163.00000   724.00000   789.00000      .25382      .24506      .31027      .16178      .31229      .25171      .45436      .39680      .40392      .33270      .31391      .36125      .44887      .43606      .33249      .26136      .29882      .30475      .34522      .33888      .36775      .38026      .14125      .16601      .14665      .12837      .35154      .32479      .28270      .29515      .31473      .33993      .22865      .20080      .35075      .31263      .22800      .20052      .26431      .32342      .28230      .26878      .18411      .18115      .20366      .17127      .37731      .32021      .20489      .23477      .40142      .37573      .46804      .39277      .22109      .31784      .19140      .18048      .18228      .14883      .18777      .18083      .14933      .15079      .19359      .19280      .17510      .19235      .22233      .20891      .09029      .11140      .13718      .11146      .21612      .12796      .15777      .09117      .16969      .12557      .20654      .24670      .20095      .22336      .13996      .18729      .18281      .20610      .19627      .16594      .18269      .22585      .13866      .14452      .16961      .13853      .16825      .14505      .23372      .19334      .20954      .21661
    29.00000065-02-29                       2.00000 40778.00000    57.00000    48.00000     9.00000     1.00000     1.00000     1.00000      .00000    14.00000     1.00000    55.00000     1.00000     2.00000     1.00000      .00000   999.00000     1.00000     1.00000    34.00000   888.000000        0        0          0     9.00000     6.00000     1.00000     8.50000     4.00000      .00000     4.00000      .00000      .00000      .00000     3.00000      .00000     6.00000      .00000      .00000      .00000    17.00000     9.00000     3.00000     2.00000     1.00000     8.00000     1.00000    24.00000        17.0      .50449    29.00000       192.0       158.0       139.0       139.0        93.0       125.0       234.0       190.0       312.0       321.0       366.0       419.0       522.0       576.0       848.0       683.0      1125.0      1111.0      1224.0      1252.0       397.0       297.0       737.0       615.0       199.0       165.0       202.0       206.0       628.0       615.0        61.0        54.0       195.0       229.0       408.0       433.0       637.0       521.0        47.0        44.0       111.0       139.0       852.0       757.0        18.0        58.0       442.0       530.0       532.0       671.0       571.0       632.0       286.0       327.0        87.0        53.0      1368.0      1062.0       452.0       386.0      1913.0      2341.0      1475.0      1561.0    29.00000065-02-29                    1237.00000  1111.00000  1454.00000  1575.00000  1183.00000  1028.00000   823.00000   883.00000   388.00000   387.00000   208.00000   175.00000   234.00000   229.00000   342.00000   237.00000   332.00000   395.00000   251.00000   277.00000  1132.00000  1005.00000  1157.00000  1031.00000   511.00000   563.00000  1202.00000  1239.00000   152.00000   171.00000    63.00000    86.00000   608.00000   526.00000   129.00000   187.00000   836.00000  1022.00000      .20199      .18161      .25527      .19142      .23794      .25748      .43497      .35068      .39374      .38139      .23516      .22522      .37909      .50375      .26569      .27430      .24140      .25032      .34598      .34125      .33111      .30531      .22880      .18595      .30933      .30245      .18302      .22186      .24733      .22666      .17115      .26433      .32982      .32714      .28360      .32832      .35710      .26352      .30472      .28198      .25281      .24241      .28938      .19534      .35074      .19206      .36491      .39527      .38601      .38488      .49265      .44241      .24721      .40856      .26120      .43041      .14129      .17249      .21240      .26109      .20721      .19598      .21341      .17237      .22225      .17704      .23042      .23211      .17293      .14663      .13411      .10667      .11994      .15706      .17021      .20109      .17849      .11016      .14118      .12184      .13780      .21339      .12848      .20772      .14305      .17436      .23289      .18631      .21459      .16623      .21229      .20247      .13872      .10022      .13702      .10641      .15494      .14745      .15134      .13172      .21906      .20513
    31.00000065-02-31                       2.00000 40834.00000    59.00000    55.00000     4.00000     1.00000     1.00000     1.00000      .00000    16.00000     1.00000    58.00000     1.00000     2.00000     1.00000      .00000    14.00000     1.00000     1.00000   999.00000   888.00000999      999      999                          4.00000      .50000     4.00000      .00000      .00000      .00000     3.00000      .00000      .00000      .00000      .00000      .00000      .00000     3.00000      .00000                                                                                        23.00000         7.0     3.23319    31.00000       189.0       141.0       132.0       147.0       104.0       106.0       228.0       199.0       279.0       283.0       392.0       385.0       508.0       608.0       894.0       892.0      1186.0      1053.0      1105.0      1177.0       354.0       344.0       781.0       684.0       198.0       160.0       229.0       211.0       746.0       816.0        57.0        52.0       252.0       236.0       448.0       436.0       574.0       606.0        47.0        47.0       115.0       130.0       860.0       827.0        23.0        69.0       511.0       572.0       587.0       715.0       720.0       817.0       285.0       307.0        69.0        57.0      1307.0      1148.0       444.0       437.0      2231.0      2689.0      1748.0      1525.0    31.00000065-02-31                    1245.00000   996.00000  1691.00000  1902.00000  1244.00000  1183.00000   903.00000  1086.00000   366.00000   402.00000   285.00000   253.00000   282.00000   285.00000   300.00000   266.00000   375.00000   514.00000   316.00000   324.00000  1350.00000  1210.00000  1010.00000  1242.00000   583.00000   558.00000  1368.00000  1203.00000   193.00000   171.00000   124.00000   123.00000   788.00000   842.00000   135.00000   239.00000  1105.00000  1087.00000      .22845      .26445      .24581      .17050      .29625      .26403      .47431      .45640      .35766      .38302      .34644      .37649      .46492      .45553      .19603      .25306      .27577      .33819      .35595      .38924      .26636      .38589      .36354      .32298      .23392      .21132      .20615      .24360      .35885      .27691      .21639      .45604      .23107      .27787      .22274      .26829      .35652      .35705      .29226      .24903      .39266      .37073      .16026      .19342      .24312      .16438      .39159      .39853      .35651      .34533      .41497      .36930      .35016      .36281      .06812      .09866      .30735      .28229      .22192      .20278      .23796      .26355      .22180      .16815      .22864      .24713      .28084      .25465      .21121      .23439      .21597      .19320      .15800      .15115      .17500      .12776      .18556      .15860      .13551      .15852      .16913      .16558      .15718      .17293      .15497      .16278      .24569      .23457      .19795      .24516      .28348      .25332      .08730      .14378      .11787      .09476      .18273      .22594      .10571      .13348      .23405      .24423
    36.00000065-02-36                       2.00000 40925.00000    49.00000    46.00000     3.00000     2.00000     1.00000     1.00000      .00000    18.00000     1.00000    50.00000     1.00000     1.00000     1.00000      .00000    14.00000     1.00000     1.00000    30.00000   888.000000        0        0          0    15.00000     4.00000      .50000     4.00000      .00000      .00000     4.00000     3.00000      .00000      .00000     3.00000      .00000     2.00000     4.00000      .00000     8.00000    24.00000     8.00000     3.00000     2.00000      .00000     8.00000     1.00000    22.00000         5.0      .51041    36.00000       140.0       153.0        80.0        99.0        79.0        81.0       112.0       122.0       172.0       235.0       346.0       367.0       413.0       380.0       577.0       540.0       724.0       761.0       862.0       843.0       261.0       223.0       488.0       467.0       170.0       141.0       175.0       174.0       486.0       517.0        56.0        46.0       130.0       138.0       275.0       301.0       378.0       346.0        28.0        28.0       105.0       107.0       607.0       655.0        37.0        46.0       308.0       370.0       394.0       479.0       587.0       562.0       284.0       223.0        48.0        46.0       974.0       773.0       324.0       289.0      1845.0      2128.0      1221.0      1383.0    36.00000065-02-36                     854.00000   769.00000  1192.00000  1423.00000   988.00000   837.00000   617.00000   671.00000   265.00000   294.00000   169.00000   163.00000   217.00000   216.00000   304.00000   194.00000   228.00000   356.00000   200.00000   193.00000   831.00000   718.00000   769.00000   836.00000   369.00000   437.00000   816.00000   829.00000   146.00000   140.00000    79.00000    75.00000   490.00000   522.00000   101.00000   142.00000   650.00000   763.00000      .33704      .37589      .33880      .34355      .41846      .44677      .46797      .43968      .45401      .47782      .37889      .39047      .51587      .47432      .40463      .36120      .32210      .29611      .31766      .33647      .31036      .33039      .27791      .32641      .20982      .29771      .33480      .33202      .31790      .29988      .27256      .27446      .28449      .27648      .35024      .31036      .26340      .23974      .34544      .28764      .39054      .39301      .37492      .32648      .20420      .21204      .51484      .45337      .33668      .35633      .52959      .52203      .47810      .34737      .45498      .41304      .23151      .26646      .24294      .28939      .23363      .22174      .21320      .19478      .23688      .26768      .24305      .26015      .20245      .21567      .19958      .19445      .13522      .17194      .21029      .14636      .17634      .10331      .11790      .12868      .21827      .25155      .17546      .18173      .18308      .23920      .27831      .21694      .23771      .20390      .27494      .23851      .16631      .17694      .16034      .20089      .16206      .16457      .16388      .20417      .22879      .20770
    39.00000065-02-39                       2.00000 40941.00000    50.00000    43.00000     7.00000     2.00000     1.00000     1.00000      .00000    18.00000     1.00000    53.00000     1.00000     1.00000     1.00000      .00000    16.00000     1.00000     1.00000    16.00000   888.000000        2        0          2     5.00000     6.00000     1.00000     7.50000      .00000      .00000      .00000      .00000     4.00000      .00000     3.00000      .00000      .00000     2.00000      .00000      .00000     9.00000     8.00000     2.00000      .00000      .00000     5.00000      .00000    15.00000        23.0      .81722    39.00000       173.0       144.0        80.0       112.0        50.0        61.0       142.0       129.0       253.0       252.0       272.0       299.0       374.0       395.0       657.0       544.0       955.0       987.0      1118.0      1035.0       332.0       302.0       614.0       540.0       165.0       129.0       157.0       126.0       760.0       783.0        37.0        50.0       153.0       153.0       280.0       292.0       424.0       431.0        40.0        37.0        92.0       113.0       642.0       641.0        18.0        58.0       376.0       486.0       475.0       612.0       567.0       692.0       200.0       228.0        75.0        52.0      1376.0      1007.0       407.0       357.0      1870.0      2263.0      1497.0      1529.0    39.00000065-02-39                    1160.00000   899.00000  1466.00000  1801.00000  1053.00000   989.00000   784.00000   868.00000   329.00000   334.00000   173.00000   137.00000   198.00000   182.00000   282.00000   183.00000   336.00000   382.00000   209.00000   223.00000   977.00000   872.00000   772.00000   838.00000   432.00000   454.00000  1038.00000  1021.00000   153.00000   125.00000   110.00000    76.00000   719.00000   632.00000   111.00000   155.00000   708.00000   796.00000      .31307      .39220      .36796      .38363      .41727      .40363      .44361      .44124      .35483      .37103      .39077      .36036      .53672      .47377      .21650      .15377      .25603      .25273      .33816      .32444      .31732      .24606      .30393      .27382      .19102      .19109      .18311      .19360      .31059      .32867      .30814      .27664      .26700      .18809      .25978      .21556      .27448      .30041      .15913      .30750      .45027      .31453      .25415      .23396      .13788      .13358      .28788      .29118      .17172      .14902      .17384      .20390      .38086      .32470      .05418      .11145      .19481      .17841      .24217      .22012      .23167      .20115      .13587      .15455      .14963      .15832      .17477      .17639      .16569      .16377      .19553      .17295      .11101      .09136      .15032      .12050      .09211      .08875      .13958      .14466      .25597      .20617      .12886      .14919      .17216      .20033      .23211      .20338      .18609      .18206      .23374      .21490      .12852      .13780      .11498      .11109      .14133      .17712      .12593      .17927      .19992      .21954
    45.00000065-02-45                       2.00000 41009.00000    61.00000    59.00000     2.00000     2.00000     2.00000     1.00000      .00000    13.00000     1.00000    65.00000     1.00000     1.00000     1.00000      .00000    13.00000     1.00000     1.00000    38.00000   888.000000        0        1          1     6.00000     4.00000      .50000     4.00000      .00000      .00000      .00000     6.00000      .00000      .00000     9.00000      .00000     3.00000     1.00000     4.00000     8.00000    31.00000     9.00000     3.00000     5.00000     1.00000     8.00000     1.00000    27.00000        10.0      .79963    45.00000       181.0       184.0        91.0       113.0        77.0        98.0       185.0       145.0       256.0       261.0       332.0       289.0       414.0       388.0       695.0       800.0      1030.0      1021.0      1061.0      1192.0       302.0       333.0       666.0       536.0       211.0       166.0       202.0       193.0       631.0       578.0        42.0        37.0       189.0       199.0       371.0       398.0       391.0       415.0        48.0        34.0       108.0       130.0       721.0       818.0        50.0        56.0       492.0       603.0       554.0       630.0       858.0       907.0       210.0       255.0        86.0        75.0      1000.0       860.0       370.0       318.0      1859.0      2224.0      1486.0      1660.0    45.00000065-02-45                    1048.00000  1035.00000  1342.00000  1753.00000   926.00000  1015.00000   652.00000   719.00000   272.00000   303.00000   159.00000   152.00000   226.00000   232.00000   344.00000   301.00000   232.00000   340.00000   227.00000   264.00000   854.00000   859.00000   785.00000   906.00000   473.00000   539.00000  1016.00000  1222.00000   178.00000   132.00000    53.00000    89.00000   563.00000   550.00000    91.00000   116.00000   836.00000   956.00000      .36166      .35534      .38927      .29340      .46405      .43405      .34607      .36828      .46226      .47848      .25793      .29535      .41044      .48684      .31930      .31735      .23696      .26282      .29412      .26230      .34076      .25948      .11379      .09348      .19547      .14234      .34499      .33806      .29921      .33007      .23227      .15032      .22716      .18788      .33684      .26056      .14154      .25927      .07511      .23800      .37638      .34218      .31603      .27228      .08512      .13385      .19634      .20305      .23508      .17811      .34678      .30676      .30019      .39906      .32315      .29989      .19495      .21469      .15073      .11026      .16360      .15178      .18071      .19500      .18415      .17822      .22056      .20179      .18342      .19789      .20014      .16093      .15278      .11474      .19112      .20698      .14223      .16531      .19781      .13085      .17495      .26328      .16379      .13316      .19499      .14394      .14052      .20666      .18669      .19587      .20129      .20261      .10355      .10881      .11664      .08449      .19679      .20738      .11233      .16807      .22779      .19931
    46.00000065-02-46                       2.00000 41023.00000    63.00000    63.00000      .00000     2.00000     1.00000     1.00000      .00000    16.00000     1.00000    67.00000     1.00000     1.00000     1.00000      .00000    13.00000     1.00000     1.00000    44.00000   888.000002        1        0          3    13.00000     3.50000      .50000     4.00000      .00000      .00000      .00000      .00000      .00000      .00000      .00000      .00000      .00000      .00000      .00000      .00000      .00000     7.00000     3.00000     5.00000      .00000     8.00000     1.00000    24.00000         7.0     1.13946    46.00000       136.0       157.0        84.0        96.0        62.0        67.0       130.0       113.0       213.0       224.0       317.0       343.0       420.0       385.0       701.0       572.0       957.0       862.0      1067.0       878.0       258.0       254.0       611.0       555.0       178.0       125.0       176.0       182.0       529.0       500.0        39.0        34.0       150.0       189.0       361.0       374.0       404.0       401.0        28.0        39.0        77.0        76.0       601.0       634.0        17.0        46.0       446.0       505.0       501.0       602.0       506.0       617.0       268.0       258.0        75.0        40.0       898.0       792.0       342.0       309.0      1752.0      2066.0      1500.0      1555.0    46.00000065-02-46                    1077.00000  1060.00000  1195.00000  1389.00000   890.00000   810.00000   528.00000   611.00000   267.00000   274.00000   152.00000   134.00000   202.00000   184.00000   294.00000   229.00000   242.00000   280.00000   211.00000   247.00000   805.00000   719.00000   848.00000   857.00000   519.00000   557.00000  1032.00000   909.00000   157.00000   158.00000    99.00000    76.00000   483.00000   514.00000   100.00000   158.00000   690.00000   835.00000      .42512      .37794      .30467      .27817      .41936      .40675      .50348      .54162      .39249      .43171      .42762      .36407      .48272      .52279      .34601      .34025      .26490      .25446      .34757      .33851      .35199      .35901      .16816      .17532      .23810      .27860      .21318      .20051      .23449      .30222      .23261      .19027      .29229      .25624      .27273      .28849      .26264      .31583      .28202      .24237      .40740      .33779      .32758      .29998      .15029      .20855      .30071      .23182      .30882      .28757      .51025      .48091      .42663      .43553      .31349      .37461      .20896      .21900      .21353      .17453      .18660      .18152      .14550      .16974      .15494      .17570      .23670      .22641      .18352      .22027      .15984      .15479      .13352      .11951      .19756      .18871      .17687      .14623      .12397      .11701      .27646      .31382      .11124      .11565      .14331      .17555      .19404      .20697      .16802      .14617      .17665      .18863      .11585      .07748      .10535      .10708      .16306      .20471      .09668      .11569      .20292      .21227
    52.00000065-02-52                       2.00000 41135.00000    63.00000    60.00000     3.00000     1.00000     1.00000     1.00000      .00000    16.00000     1.00000    61.00000     1.00000     2.00000     1.00000      .00000    15.00000     1.00000     1.00000    17.00000   888.000000        1        0          1     2.00000     3.00000      .50000     4.00000      .00000      .00000      .00000     3.00000     3.00000      .00000      .00000      .00000     2.00000      .00000      .00000      .00000     8.00000    10.00000     3.00000     5.00000     1.00000     8.00000     1.00000    28.00000         8.0     4.90916    52.00000       216.0       183.0       114.0       129.0        84.0       109.0       225.0       168.0       312.0       355.0       388.0       418.0       589.0       629.0       904.0       756.0      1104.0      1202.0      1461.0      1425.0       448.0       371.0       837.0       696.0       211.0       173.0       267.0       234.0       845.0       744.0        60.0        71.0       236.0       246.0       461.0       449.0       586.0       596.0        40.0        45.0       136.0       146.0       760.0       864.0        48.0        63.0       537.0       642.0       672.0       806.0       861.0       925.0       317.0       393.0       102.0        81.0      1170.0       899.0       451.0       519.0      2192.0      2681.0      1606.0      1757.0    52.00000065-02-52                    1361.00000  1231.00000  1751.00000  2029.00000  1220.00000  1125.00000   772.00000   946.00000   305.00000   288.00000   206.00000   203.00000   273.00000   289.00000   352.00000   259.00000   336.00000   406.00000   283.00000   325.00000  1124.00000  1099.00000   979.00000  1161.00000   545.00000   641.00000  1307.00000  1282.00000   191.00000   193.00000   101.00000   123.00000   646.00000   956.00000   122.00000   215.00000  1002.00000  1115.00000      .23063      .23862      .24860      .21057      .29582      .34939      .39136      .45482      .33970      .39940      .41828      .44973      .50719      .47451      .25276      .27652      .28589      .31565      .33739      .32726      .31692      .35338      .17370      .18528      .12767      .21076      .20466      .29476      .26492      .21340      .23915      .29068      .28347      .28153      .24059      .28587      .27489      .19858      .13122      .14726      .29561      .29146      .18245      .24456      .23249      .27195      .33943      .31091      .30713      .30161      .41523      .42454      .42953      .36578      .07346      .22293      .23823      .24516      .18889      .18746      .21348      .22319      .18270      .20263      .20532      .19326      .20096      .19731      .20087      .19396      .19289      .20032      .10676      .16641      .20885      .15629      .12585      .10817      .10581      .14345      .21014      .20164      .18235      .25464      .24523      .26279      .16553      .16636      .27432      .23047      .27563      .21154      .11940      .17680      .12569      .13026      .17357      .19528      .19174      .12792      .19291      .21482
    53.00000065-02-53                       2.00000 41142.00000    57.00000    53.00000     4.00000     1.00000     1.00000     1.00000      .00000    16.00000     1.00000    36.00000     1.00000     2.00000     1.00000      .00000    16.00000     1.00000     1.00000     8.00000   888.00000999      999      999                          5.00000     1.00000     8.00000      .00000      .00000      .00000      .00000     4.00000      .00000     4.00000     2.00000     4.00000    12.00000     6.00000      .00000    32.00000     5.00000     3.00000      .00000      .00000     7.00000      .00000    15.00000        13.0     2.01430    53.00000       211.0       182.0       132.0       154.0        90.0       123.0       187.0       187.0       324.0       334.0       318.0       401.0       347.0       432.0       801.0       780.0      1189.0      1123.0      1213.0      1241.0       410.0       365.0       759.0       740.0       203.0       199.0       281.0       216.0       869.0       792.0        48.0        61.0       258.0       248.0       487.0       473.0       502.0       478.0        62.0        43.0       127.0       177.0       894.0      1033.0        17.0        72.0       587.0       712.0       605.0       741.0       889.0       995.0       279.0       251.0        81.0        57.0      1316.0       907.0       532.0       433.0      2439.0      2713.0      1798.0      1644.0    53.00000065-02-53                    1347.00000  1143.00000  1839.00000  1925.00000  1415.00000  1161.00000   817.00000  1017.00000   329.00000   334.00000   189.00000   186.00000   275.00000   220.00000   418.00000   300.00000   320.00000   344.00000   340.00000   283.00000  1233.00000   880.00000   981.00000  1095.00000   677.00000   638.00000  1347.00000  1254.00000   257.00000   184.00000   110.00000   102.00000   760.00000   956.00000   114.00000   207.00000  1099.00000  1237.00000      .34194      .38600      .30180      .33019      .37871      .39337      .43546      .41697      .47153      .39810      .22571      .43558      .50116      .39648      .23231      .32733      .21714      .31001      .33765      .31654      .43298      .38475      .18131      .20417      .28499      .23025      .32202      .35989      .35000      .34071      .17198      .34114      .31136      .20488      .27110      .31914      .32710      .14641      .15031      .29273      .36297      .35532      .29149      .31299      .08573      .20102      .27577      .22187      .28398      .26742      .35931      .21900      .51015      .20331      .11206      .36324      .23406      .24740      .19133      .23928      .22349      .21827      .19734      .21443      .20663      .20001      .22853      .18360      .19301      .19464      .23714      .18715      .13856      .17535      .10626      .20407      .16525      .09146      .17091      .23323      .19626      .26104      .19746      .24934      .22723      .23919      .13859      .12015      .20479      .17415      .27254      .14208      .22854      .15138      .10420      .20346      .16848      .15242      .08263      .13335      .22203      .21101
    54.00000065-02-54                       2.00000 41149.00000    63.00000    60.00000     3.00000     2.00000     2.00000     1.00000      .00000    18.00000     1.00000    67.00000     1.00000     1.00000     1.00000      .00000    18.00000     1.00000     1.00000    13.00000   888.000000        1        0          1    11.00000     1.50000      .50000     3.00000      .00000      .00000     2.00000      .00000     6.00000      .00000     1.00000      .00000     6.00000     2.00000      .00000      .00000    17.00000    10.00000     3.00000     5.00000     2.00000     8.00000     1.00000    29.00000         3.0     1.28689    54.00000       161.0       134.0        83.0       100.0        73.0        86.0       142.0       151.0       252.0       302.0       367.0       361.0       439.0       611.0       728.0       789.0      1347.0      1062.0      1280.0      1228.0       364.0       333.0       779.0       651.0       248.0       201.0       239.0       210.0       579.0       628.0        55.0        62.0       209.0       222.0       455.0       378.0       536.0       519.0        72.0        67.0       105.0       100.0       668.0       619.0        22.0        88.0       546.0       567.0       628.0       738.0       814.0       941.0       302.0       297.0        85.0        77.0      1017.0      1060.0       445.0       373.0      2148.0      2321.0      1727.0      1614.0    54.00000065-02-54                    1427.00000   873.00000  1652.00000  1568.00000  1009.00000  1034.00000   618.00000   779.00000   316.00000   320.00000   179.00000   191.00000   228.00000   226.00000   311.00000   241.00000   294.00000   416.00000   191.00000   270.00000   917.00000   986.00000   942.00000  1040.00000   458.00000   488.00000  1050.00000  1055.00000   197.00000   190.00000   108.00000    87.00000   453.00000   549.00000   136.00000   188.00000   710.00000   799.00000      .40279      .40107      .38937      .42725      .39274      .36976      .53189      .54816      .43249      .36378      .44863      .39851      .59006      .48570      .39532      .35129      .25356      .26290      .36853      .36263      .33401      .34387      .18788      .21254      .16998      .11630      .24909      .15739      .28536      .26287      .28272      .31540      .28664      .28363      .31871      .28025      .28238      .19668      .18825      .27895      .40359      .34017      .29193      .34530      .22268      .15740      .27707      .23024      .30681      .28768      .40883      .35837      .43037      .45094      .20757      .34719      .21066      .20356      .19648      .20395      .19271      .22411      .16814      .19454      .20373      .21156      .23260      .20583      .17142      .16592      .19547      .17725      .14506      .13454      .22031      .13706      .16188      .12749      .12343      .10353      .25987      .20207      .18816      .13148      .19313      .17065      .19838      .17655      .16536      .15307      .22042      .17018      .09880      .14737      .15619      .12916      .16873      .18687      .10898      .18748      .25313      .25476
    56.00000065-02-56                       2.00000 41184.00000    59.00000    55.00000     4.00000     2.00000     1.00000     5.00000      .00000    18.00000     1.00000    91.00000     8.00000     2.00000     2.00000      .00000    16.00000     1.00000     1.00000   888.00000   888.000000        1        1          2     1.00000     4.00000      .50000     4.50000      .00000      .00000      .00000      .00000      .00000      .00000      .00000      .00000      .00000      .00000     3.00000      .00000     3.00000    10.00000     3.00000                             8.00000     1.00000    27.00000         7.0     1.59874    56.00000       176.0       136.0       104.0       106.0        80.0        92.0       152.0       120.0       267.0       321.0       406.0       448.0       425.0       503.0       814.0       817.0      1073.0      1211.0      1101.0      1157.0       309.0       289.0       535.0       525.0       228.0       155.0       260.0       213.0       586.0       609.0        66.0        77.0       221.0       242.0       440.0       387.0       533.0       575.0        46.0        51.0        98.0       133.0       783.0       750.0        31.0        71.0       541.0       595.0       457.0       598.0       753.0       918.0       341.0       364.0       107.0        58.0       998.0       716.0       338.0       323.0      1709.0      2140.0      1393.0      1854.0    56.00000065-02-56                    1072.00000  1147.00000  1358.00000  1553.00000  1083.00000   856.00000   666.00000   763.00000   291.00000   273.00000   193.00000   161.00000   264.00000   288.00000   311.00000   268.00000   268.00000   389.00000   214.00000   254.00000   849.00000   862.00000   945.00000  1096.00000   547.00000   646.00000  1167.00000  1266.00000   201.00000   212.00000   100.00000   118.00000   565.00000   602.00000   119.00000   164.00000   911.00000  1062.00000      .32288      .31246      .32322      .30684      .38601      .40763      .49150      .48618      .45758      .36992      .34123      .28512      .46220      .37705      .25754      .24046      .24131      .19977      .31347      .32160      .31831      .31077      .08902      .08832      .22978      .24149      .26315      .22034      .21829      .19118      .26085      .27821      .27521      .22339      .28557      .25131      .24267      .27771      .16640      .22048      .34607      .39134      .18914      .28702      .10936      .23105      .19464      .16481      .09322      .07870      .32677      .30666      .33958      .39859      .37215      .34376      .21758      .18344      .12119      .12366      .19115      .18617      .13160      .13600      .15103      .12157      .19888      .18487      .15133      .18164      .14685      .10588      .09907      .12827      .23041      .17059      .24761      .18680      .12867      .13809      .19702      .18511      .12404      .11973      .15316      .13109      .10869      .13402      .17846      .14907      .14788      .12367      .14545      .13298      .10657      .11159      .09173      .11981      .09635      .11985      .22089      .21531
    59.00000065-02-59                       2.00000 41360.00000    57.00000    50.00000     7.00000     2.00000     1.00000     3.00000      .00000    16.00000     1.00000    62.00000     3.00000     2.00000     2.00000      .00000    16.00000     1.00000      .00000   888.00000   888.000000        0        0          0     6.00000     5.00000     1.00000     5.00000      .00000      .00000      .00000     2.00000     6.00000      .00000      .00000      .00000      .00000      .00000      .00000      .00000     8.00000    10.00000     3.00000     3.00000     1.00000     8.00000      .00000    25.00000        16.0     1.06747    59.00000       168.0       112.0        81.0        98.0        80.0        83.0       152.0       148.0       237.0       299.0       316.0       352.0       421.0       508.0       849.0       724.0       745.0       796.0      1152.0      1048.0       312.0       289.0       516.0       494.0       152.0       134.0       232.0       220.0       682.0       639.0        57.0        56.0       130.0       143.0       459.0       357.0       422.0       377.0        16.0        34.0       110.0       133.0       586.0       566.0        31.0        63.0       310.0       393.0       448.0       569.0       543.0       653.0       292.0       284.0        89.0        71.0      1063.0       834.0       325.0       321.0      1624.0      2209.0      1430.0      1484.0    59.00000065-02-59                    1009.00000   873.00000  1340.00000  1544.00000  1058.00000   913.00000   737.00000   813.00000   262.00000   267.00000   161.00000   136.00000   216.00000   185.00000   281.00000   247.00000   233.00000   320.00000   301.00000   258.00000   963.00000   829.00000   819.00000   865.00000   415.00000   468.00000  1023.00000  1000.00000   119.00000   130.00000    74.00000    68.00000   734.00000   657.00000    82.00000   120.00000   685.00000   803.00000      .24774      .21517      .18682      .24636      .24525      .26571      .44555      .46205      .36100      .28166      .36626      .33424      .46542      .40023      .25498      .33147      .29963      .28265      .29462      .30422      .27624      .34179      .21408      .17835      .10228      .16525      .19286      .28482      .28173      .28395      .26255      .27578      .22788      .13623      .20844      .29240      .30961      .12513      .25035      .34660      .22567      .22339      .16623      .16805      .20336      .24057      .32382      .35763      .35285      .28823      .32680      .36606      .38502      .33601      .24258      .43562      .21318      .23957      .10731      .12418      .24169      .19637      .16019      .18115      .17272      .17332      .21693      .21084      .15641      .15778      .15019      .15777      .11449      .18321      .11958      .17265      .09892      .09453      .12070      .11885      .16746      .20343      .14083      .15652      .16626      .20812      .24760      .18142      .18142      .17996      .24141      .22738      .08744      .09709      .09747      .10260      .14377      .14881      .10825      .13614      .21780      .21900
    60.00000065-02-60                       2.00000 41375.00000    65.00000    63.00000     2.00000     2.00000     1.00000     1.00000      .00000    14.00000     1.00000    76.00000     1.00000     1.00000     1.00000      .00000    16.00000     1.00000     1.00000    28.00000   888.000000        0        0          0      .00000     2.00000      .50000     2.50000      .00000      .00000      .00000      .00000      .00000      .00000      .00000      .00000      .00000      .00000      .00000      .00000      .00000    10.00000     3.00000     5.00000     3.00000     7.00000     1.00000    29.00000         3.0      .37081    60.00000       190.0       147.0       117.0        91.0        63.0        89.0       139.0       127.0       241.0       243.0       290.0       341.0       394.0       431.0       804.0       632.0       899.0       809.0       997.0      1072.0       319.0       272.0       549.0       448.0       169.0       168.0       196.0       188.0       588.0       587.0        47.0        60.0       129.0       162.0       372.0       355.0       378.0       407.0        26.0        38.0        74.0       129.0       639.0       664.0        25.0       129.0       333.0       418.0       469.0       629.0       613.0       622.0       313.0       297.0        83.0        72.0       975.0       744.0       341.0       286.0      1949.0      2057.0      1437.0      1404.0    60.00000065-02-60                    1022.00000   751.00000  1296.00000  1595.00000   968.00000   856.00000   708.00000   666.00000   247.00000   259.00000   156.00000   138.00000   209.00000   205.00000   270.00000   252.00000   189.00000   294.00000   248.00000   245.00000   870.00000   779.00000   799.00000   904.00000   416.00000   460.00000   979.00000   937.00000   141.00000   155.00000    90.00000    84.00000   574.00000   543.00000   109.00000   147.00000   766.00000   826.00000      .31675      .31655      .36610      .39156      .50031      .46640      .43268      .44308      .44300      .33620      .43498      .38427      .52039      .49002      .34550      .37289      .29871      .32888      .34779      .34191      .34984      .35687      .18121      .19276      .17420      .19054      .27831      .33664      .26401      .30244      .25740      .26071      .29554      .21123      .27948      .34564      .33756      .28251      .36929      .37747      .40488      .31656      .34847      .34060      .29356      .23747      .33592      .33766      .30156      .27070      .27344      .28680      .43113      .43888      .29278      .41627      .28621      .26349      .14198      .16685      .23895      .23129      .20882      .20707      .18454      .23996      .23962      .21823      .24323      .20534      .18914      .19844      .14884      .15947      .15180      .23702      .17264      .15025      .13518      .13723      .22790      .32047      .16654      .14977      .22108      .19288      .20406      .18660      .21477      .21064      .22192      .20120      .11252      .12423      .11050      .12129      .16674      .17535      .10930      .13170      .23136      .23322
